# Supplementary material
Source: Springer Nature journal article supplement (https://www.springermedizin.de/resource/supplementary/12913_2007_630_MOESM1_ESM.pdf/9535840)

Name of Watchtower (contacts)

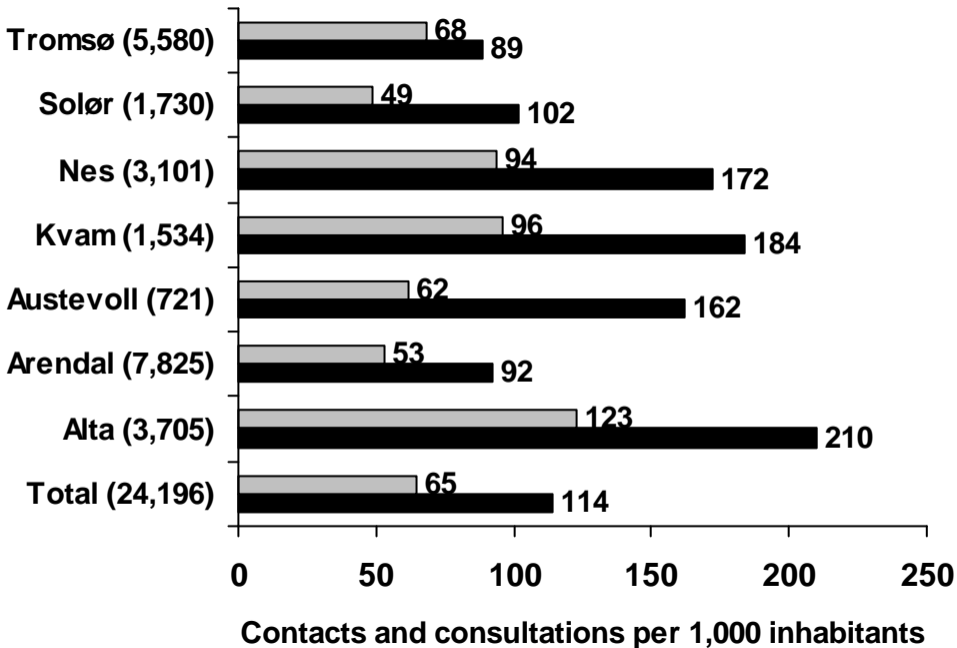

Supplement: MOESM1 [file 9535840]
